# Supplementary material for: Lumican is elevated in the lung in human and experimental acute respiratory distress syndrome and promotes early fibrotic responses to lung injury
Source: Springer Nature journal article supplement (doi:10.1186/s12967-022-03597-z), 2022-09-04
Supplement: MOESM1 [file 23451754]

**Table S1** qRT-PCR primer sequences

| Gene          | Primer | Sequence                | Product size (bp) | Organism     |
|---------------|--------|-------------------------|-------------------|--------------|
| GAPDH         | F      | GGTGGTCTCCTCTGACTTCAACA | 213               | Homo sapiens |
|               | R      | TCTCTTCCTCTTGTGCTCTTGCT |                   |              |
| Gapdh         | F      | CATCACTGCCACCCAGAAGACTG | 153               | Mus musculus |
|               | R      | ATGCCAGTGAGCTTCCCGTTCAG |                   |              |
| LUMICAN       | F      | TCATCCATCTCCAGCACAATCG  | 250               | Homo sapiens |
|               | R      | ATTCCACTATCAGCCAGTTCGTT |                   |              |
| Lumican       | F      | CCTCTCACACCGAACTGCCTCAT | 216               | Mus musculus |
|               | R      | TCACGCCAGCCTCTGGATGAAGT |                   |              |
| COL1A1        | F      | GATTCCCTGGACCTAAAGGTGC  | 107               | Homo sapiens |
|               | R      | AGCCTCTCCATCTTTGCCAGCA  |                   |              |
| COL3A1        | F      | GCTACGGCAATCCTGAACTTCC  | 236               | Homo sapiens |
|               | R      | GCAACCATCCTCCAGAACTGTG  |                   |              |
| $\alpha$ -SMA | F      | TTACTACTGCTGAGCGTGAGATT | 201               | Homo sapiens |
|               | R      | CGATGAAGGATGGCTGGAACA   |                   |              |
| E-cadherin    | F      | TACGCCTGGGACTCCACCTA    | 101               | Homo sapiens |
|               | R      | CCAGAAACGGAGGCCTGAT     |                   |              |

Abbreviations:  $\alpha$ -SMA, alpha-smooth muscle actin; COL1A1, alpha-1 type I collagen; COL3A1, alpha-1 type III collagen; GAPDH, Glyceraldehyde-3-Phosphate Dehydrogenase

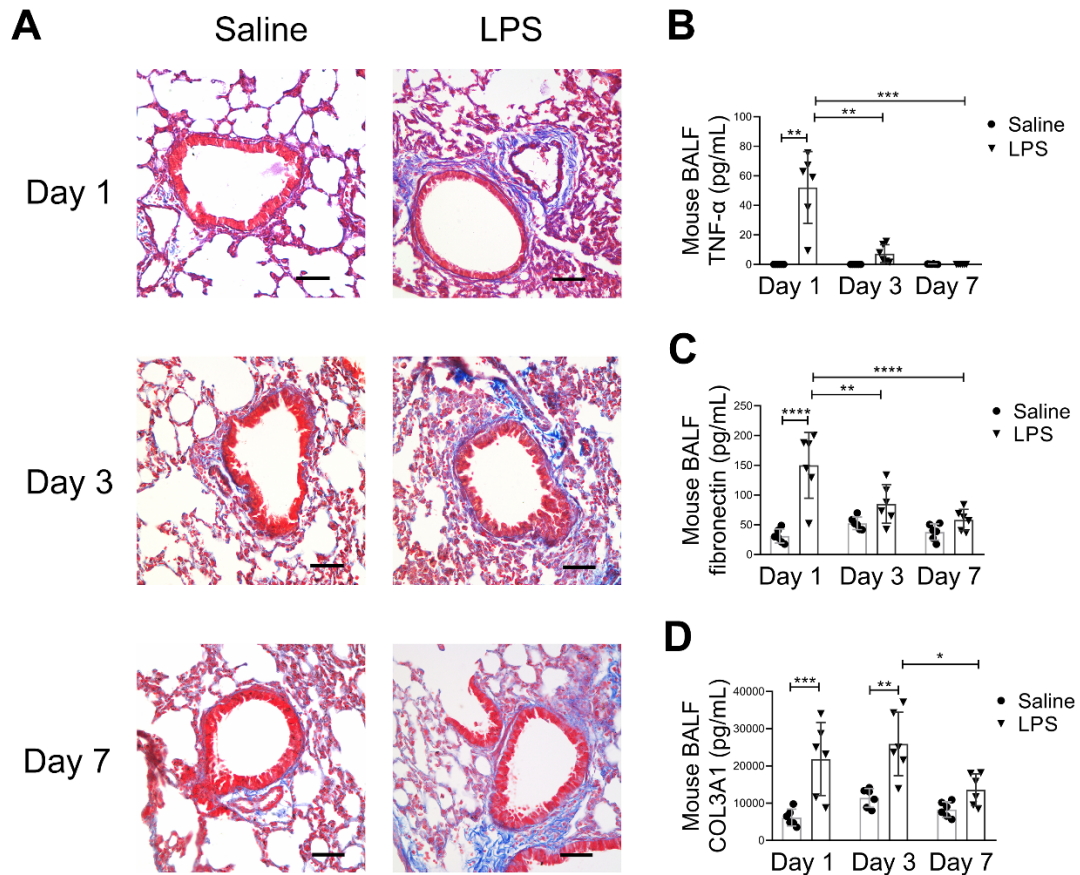

**Fig. S1** Histopathology and BALF levels of proinflammatory and profibrotic cytokines in mice after LPS challenge. (A) Representative images of lung sections stained with Masson's trichrome stain in mice on days 1, 3, and 7 after LPS challenge. Scale bars, 50  $\mu$ m. The levels of TNF- $\alpha$  (B), fibronectin (C), and COL3A1 (D) in BALF were measured by ELISA on days 1, 3, and 7 after LPS challenge. Each group contained 6 mice. Values are expressed as the mean and standard deviation. The significance of between-group differences was examined using two-way analysis of variance followed by Tukey's multiple comparisons test to analyse the means of multiple samples.  $p < 0.05$  was considered statistically significant. \* $p < 0.05$ , \*\* $p < 0.01$ , \*\*\* $p < 0.005$ , \*\*\*\* $p < 0.0001$ .

Abbreviations: BALF, bronchoalveolar lavage fluid; COL3A1, alpha-1 type III collagen; ELISA, enzyme-linked immunosorbent assay; LPS, lipopolysaccharides; TNF- $\alpha$ , tumor necrosis factor-alpha

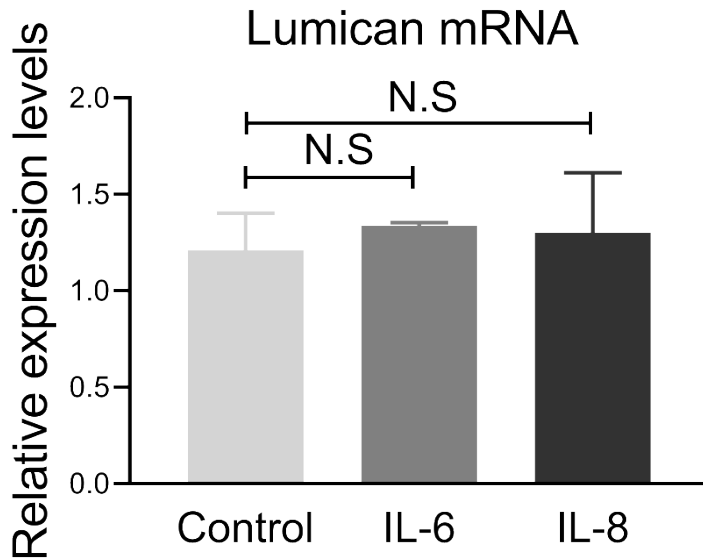

**Fig. S2** Lumican mRNA levels in primary HLF treated with IL-6 or IL-8. The lumican mRNA levels in HLF treated with or without 10 ng/ml IL-6 or 10 ng/ml IL-8 for 48 h were detected by real-time RT-PCR. Values are expressed as the mean and standard deviation. Three independent experiments were conducted with triplicate wells per treatment in each experiment (n=3). The significance of between-group differences was examined using analysis of variance followed by Tukey's multiple comparisons test to analyse the means of multiple samples.  $p < 0.05$  was considered statistically significant.

Abbreviations: HLF, primary human lung fibroblasts; IL, interleukin; RT-PCR, reverse-transcription polymerase chain reaction
